# 1 **Title page**

2 Leptospirosis in Pregnancy: Prevalence, Risk Factors, Clinical Characteristics, and Outcomes  
3 in a North Indian Population

## 4 **Authors**

5 Michal Shrestha<sup>1¶</sup>, Saswati S Choudhury<sup>2&</sup>, Carolin Solomi V<sup>3&</sup>, Anjali Rani<sup>4&</sup>, Indrani  
6 Roy<sup>5&</sup>, Farzana Zahir<sup>6&</sup>, Swapna D Kakoty<sup>7&</sup>, Robin Medhi<sup>7&</sup>, Pranabika Mahanta<sup>8&</sup>,  
7 Rupanjali Deka<sup>9&</sup>, Manisha Nair<sup>1\*</sup>

## 8 **Affiliations**

9 <sup>1</sup> National Perinatal Epidemiology Unit, Nuffield Department of Population Health, University  
10 of Oxford, Oxford, United Kingdom

11 <sup>2</sup> Gauhati Medical College and Hospital (GMCH), Bhangagarh, Guwahati, Assam, India

12 <sup>3</sup> Makunda Christian Leprosy and General Hospital, Bazaricherra, Karimganj, Assam, India

13 <sup>4</sup> Institute of Medical Sciences, Banaras Hindu University, Banaras Hindu University,  
14 Varanasi, Uttar Pradesh, India

15 <sup>5</sup> Nazareth Hospital, Nongkynrih, Laitumkhrah, Shillong, Meghalaya, India

16 <sup>6</sup> Assam Medical College (AMC), Barbari, Dibrugarh, Assam, India

17 <sup>7</sup> Fakhruddin Ali Ahmed Medical College and Hospital (FAAMCH), Joti Gaon, Assam, India

18 <sup>8</sup> Jorhat Medical College and Hospital, Kushal Konwar Path, Barbheta, Jorhat, Assam, India

19 <sup>9</sup> Srimanta Sankaradeva University of Health Sciences, Gauhati Medical College Hill-Top  
20 Road, Narkashur Hilltop, Bhangagarh, Guwahati, Assam, India

21 \* Corresponding author

22 E-mail: [manisha.nair@npeu.ox.ac.uk](mailto:manisha.nair@npeu.ox.ac.uk) (MN)

**NOTE: This preprint reports new research that has not been certified by peer review and should not be used to guide clinical practice.**

## 23 **Abstract**

24 **Introduction:** Leptospirosis, a neglected zoonotic disease bears a significant global burden  
25 and is endemic in India. Leptospirosis in pregnancy can lead to severe adverse outcomes but is  
26 often misdiagnosed and underreported as clinical presentation is masked by the symptoms of  
27 common obstetric complications and other endemic infectious diseases. Our aim was to  
28 generate epidemiological information on the prevalence and distribution, risk factors, and  
29 outcomes (both maternal and fetal) of the disease among a population of pregnant and post-  
30 partum women in northern India.

31 **Methods:** We conducted a cross-sectional study on a random sample of 170 pregnant and post-  
32 partum women in 10 hospitals across three northern states of India in whom ELISA IgG and  
33 IgM antibody tests were done. Women were categorised as seropositive if they had high levels  
34 of either IgG or IgM. We identified study variables based on an available systematic review of  
35 leptospirosis in pregnancy. Fisher's Exact and Wilcoxon rank-sum non-parametric tests were  
36 used to analyse the association between leptospirosis in pregnancy and a range of socio-  
37 demographic and clinical factors. An analysis of the geographical distribution of the  
38 seropositive cases was undertaken using Geographical Information System mapping.

39 **Results:** The prevalence of leptospirosis in pregnancy was 5.9% (95% CI: 2.85 – 10.55%) with  
40 80% of the seropositive cases living near water sources and lowlands. Proportions of cardiac  
41 problems, raised liver enzymes, anaemia and adverse fetal outcomes were higher among  
42 women who were seropositive compared with women who were seronegative. Adverse  
43 maternal and fetal outcomes were more common among seropositive pregnant and post-partum  
44 women compared with seronegative women.

45 **Conclusions:** This is the first descriptive epidemiological study of leptospirosis in pregnancy  
46 in India that generates important hypotheses emphasizing the need for further research.

47 Pregnant women in endemic regions should be screened for leptospirosis for early diagnosis  
48 and treatment to avoid adverse outcomes.

## 49 **Author Summary**

50 Leptospirosis bears a significant global burden and is endemic in India. In pregnancy, it can  
51 lead to serious complications, but leptospirosis in pregnancy is often misdiagnosed and  
52 underreported as clinical presentation of the disease is masked by the symptoms of common  
53 obstetric complications and other endemic infectious diseases. There are no detailed studies  
54 about leptospirosis in pregnancy in India with almost all published studies being case reports.  
55 In recognition of this limitation, this cross-sectional study was undertaken to understand the  
56 rates, risk factors and outcomes of leptospirosis in pregnancy in India. ELISA IgG and IgM  
57 antibody tests were conducted to determine the seroprevalence of leptospirosis in the  
58 population. The rate of leptospirosis in pregnancy in our study population was found to be  
59 5.9%. A majority of the seropositive cases lived near water sources and lowlands. The adverse  
60 clinical presentation of cardiac problems, raised liver enzymes, anaemia and adverse fetal  
61 outcomes were observed to be more common among seropositive pregnant and post-partum  
62 women compared with seronegative women. The study highlights the need for more research  
63 and for screening of leptospirosis in pregnant women living in endemic regions for early  
64 diagnosis and treatment to avoid adverse outcomes.

## 66 **Introduction**

67 Leptospirosis is a neglected, zoonotic, and waterborne disease, which infects more than a  
68 million people, and almost 60,000 deaths occur annually with 2.9 million Disability Adjusted  
69 Life Years (DALYs). It is endemic in tropical and subtropical regions of the world and is  
70 associated with poor income, low education, poor housing, absence of hygiene and sanitation  
71 [1–5]. South Asia’s tropical climate with high humidity provides an ideal environment for the  
72 survival of *Leptospira* pathogens making leptospirosis endemic in India [6]. Rodents and wide  
73 range of domestic and wild animals host and carry the pathogens which get transmitted to  
74 humans when they come in direct or indirect contact with urine from infected animals [7–9].  
75 Leptospirosis is acquired through occupational exposure and are common among people living  
76 in rodent-infested, flood-prone or overcrowded urban areas.

77

78 Leptospirosis in pregnancy is underreported and is also often misdiagnosed as clinical  
79 presentation mimics symptoms of common obstetric complications such as Pre-Eclampsia,  
80 HELLP Syndrome (Haemolysis, Elevated Liver enzymes and Low Platelets) and Acute Fatty  
81 Liver of Pregnancy (AFLP) [10]. Presentation of leptospirosis is double masked in pregnancy,  
82 firstly due to the overlap in how the disease presents itself in the general population and in  
83 pregnant women and secondly because of the overlap between the signs, symptoms and  
84 physiological interferences associated with the disease and pregnancy complications  
85 mentioned above [5]. The prevalence of leptospirosis in pregnancy and its presentations and  
86 outcomes have not been extensively studied and there is paucity of epidemiological data.  
87 Systematic review conducted by Selvarajah et al. 2021 [5] to investigate the rates, risk factors  
88 and outcomes of leptospirosis in pregnancy estimated the incidence to be 1.3 per 10,000 women  
89 but also pointed out that this number could be higher in endemic areas. Leptospirosis in  
90 pregnancy, as in the general population, can present with fever, headache, muscle ache and

91 jaundice which could escalate to adverse maternal and fetal outcomes of congenital infection,  
92 spontaneous miscarriage, abortion, maternal death, preterm birth, low birth weight in term  
93 birth, stillbirth, intrauterine fetal death (IUFD), neonatal death, preeclampsia, deranged liver  
94 functions, and respiratory problems [5]. The similarities of its signs and symptoms with  
95 pregnancy complications often leads to under- or mis-diagnosis of leptospirosis as it is not  
96 included in the immediate shortlist of differential diagnoses by health professionals. Further,  
97 the review suggested that adverse fetal outcomes were higher in pregnant women who were  
98 infected in early trimesters of pregnancy (first or second trimester) compared with women who  
99 were infected in their third trimester [5].

100

101 Even with subtle presentations, leptospirosis in pregnancy could be life-threatening and has  
102 adverse effect on both the mother and the fetus [10]. These adverse effect of leptospirosis to  
103 maternal and neonatal health is a serious concern. However, only 13% of published studies in  
104 leptospirosis from the WHO region of south-east Asia is on pregnancy according to Selvarajah  
105 et al [5]. There have not been any detailed epidemiological studies for leptospirosis in  
106 pregnancy in India with almost all published studies being case reports [5]. In recognition of  
107 this limitation, our aim was to conduct a cross-sectional study to understand the  
108 epidemiological context of leptospirosis in pregnancy in India with the following specific  
109 objectives:

- 110 1. To determine the seroprevalence of *Leptospira* antibody in pregnant women in the  
111 northern endemic region of India.
- 112 2. To geographically map the distribution of seropositive cases across the study region.
- 113 3. To compare the socio-economic and demographic characteristics of seropositive and  
114 seronegative pregnant/postpartum women.
- 115 4. To examine the association between maternal outcomes and *Leptospira* seropositivity.

116 5. To examine the association between fetal/infant outcomes and maternal *Leptospira*  
117 seropositivity.

## 118 **Methods**

### 119 **Study-design and study settings**

120 This was a cross-sectional study nested within an ongoing case-control study of Acute Heart  
121 Failure syndrome in pregnancy undertaken through the Maternal and perinatal Health Research  
122 collaboration, India (MaatHRI) [11]. The nested study was a random sample. It included the  
123 first 170 participants recruited consecutively in the main study in whom blood samples were  
124 tested for *Leptospira* antibody levels using enzyme-linked immunosorbent assay (ELISA) IgG  
125 (Immunoglobulin G) and IgM (Immunoglobulin M) antibody tests. Pregnant and postpartum  
126 (within 6 months of childbirth) women presenting with heart failure and control participants  
127 (women with no heart failure and giving birth immediately after the case) were recruited from  
128 ten hospitals across three northern States (Assam, Meghalaya, and Uttar Pradesh).

### 129 **Study variables**

130 The selection of the study variables was informed by the systematic review of leptospirosis in  
131 pregnancy [5], and described in Table-1. Primary outcome was *Leptospira* seropositivity.  
132 Women having *Leptospira* IgM  $\geq 1.1$  Index and IgG  $\geq 15$  U/mL, measured using ELISA, were  
133 considered to have high seroprevalence of *Leptospira* antibodies, thus considered seropositive,  
134 based on the Indian population level cut-offs from the national reference laboratory. In the  
135 absence of standardised measures, the WHO recommends that population level values  
136 validated by local reference laboratories should be used to determine high seroprevalence [20].  
137 Serum samples were analysed using ELISA to estimate levels of IgM (Kit – PANBIO) and IgG

138 (Kit – DRG International, Inc). Serological diagnosis is considered to be the best method to  
139 detect *Leptospira* infections in humans. Specific antibodies appear in the blood around the fifth  
140 day after the onset of symptoms and detectable titres remain up to 10 days. Antibodies IgM  
141 usually appear early during the infection and before the IgG antibodies, therefore detection of  
142 IgM antibodies during the serological diagnosis is indicative of recent or beginning phase of  
143 the infection, whereas high titres of IgG antibodies indicate the recovery or convalescent phase  
144 of leptospirosis. IgG antibodies remain in the blood for years specifying history of past  
145 exposure to the disease. MAT (microscopic agglutination test) is considered as the gold  
146 standard diagnostic method for leptospirosis by the WHO (World Health Organization) but  
147 ELISA is commonly used as the test is more readily available in low resource settings, is user-  
148 friendly and has advantage of sensitivity and specificity over MAT [1,6,9,12,13].

149  
150 Determinants of leptospirosis in pregnancy [5], including demographic, economic and  
151 behavioural characteristics of pregnant women were considered as predictors or exposure  
152 variables for high seropositivity. Socio-demographic characteristics included age of the  
153 women, type of residence, religion, marital status. Socio-economic factors included poverty,  
154 education level of the women and their husbands, employment status of women and their  
155 husbands; and behavioural factors included smoking, consumption of tobacco and alcohol,  
156 chewing of betel nut and consuming fermented fish. These characteristics were compared  
157 between the seropositive and seronegative groups of pregnant women.

158 Clinical characteristics that have been identified as being associated with leptospirosis in  
159 pregnancy [5] such as cardio-vascular problems (cardiac complications and hypertensive  
160 disorders), deranged liver function, respiratory problems and low haemoglobin were compared  
161 between the two groups. Mortality and maternal complications such as postpartum  
162 haemorrhage and sepsis were also compared.

163

164 Adverse fetal and infant outcomes were analysed to compare their prevalence in the  
165 seropositive and seronegative groups of women. Information on pregnancy loss, stillbirth, low  
166 birth weight, premature birth, infant mortality and admission to NICU (Neonatal Intensive Care  
167 Unit) were used to generate a dummy variable for adverse fetal/infant outcomes. The analysis  
168 of fetal/infant outcomes was restricted to singleton pregnancies as the number of fetuses are  
169 likely to influence the selected adverse outcomes irrespective of leptospirosis infection.

170

171 **Table 1. Description of the study variables**

| Variables of Interest                |                     | Definition                                                                                                                                                                                                                                                                                                                                                                                                                                                          |
|--------------------------------------|---------------------|---------------------------------------------------------------------------------------------------------------------------------------------------------------------------------------------------------------------------------------------------------------------------------------------------------------------------------------------------------------------------------------------------------------------------------------------------------------------|
| Independent Variables                | Dependent Variables |                                                                                                                                                                                                                                                                                                                                                                                                                                                                     |
| Seropositive cases for leptospirosis |                     | First the pregnant/postpartum women with antibodies IgM $\geq$ 1.1 index and/ or IgG $\geq$ 15 U/ml were identified. Separate variables for positive IgM and positive IgG were generated and then combined to generate 'seropositive cases', coded 1 for 'Yes' and 0 for 'No'.                                                                                                                                                                                      |
| Age                                  |                     | All women in the sample population were 18 years and above and up to 45 years of age. Age was used as a continuous variable.                                                                                                                                                                                                                                                                                                                                        |
| Residence                            |                     | Categorised as rural '1', urban '2' and suburb '3'. No women included in the study population lived in the suburbs.                                                                                                                                                                                                                                                                                                                                                 |
| Religion                             |                     | Religion was categorised as '1' Hindu, '2' Muslim, '3' Christian, '4' Sikh and '5' Others. Due to small number of observations in each category, these were combined to generate a binary variable '1' Hindu and '2' Muslim, Christian and other minority religious communities.                                                                                                                                                                                    |
| Poverty                              |                     | Below poverty line (BPL) was used to define poverty. The Planning Commission of India defines 'BPL' households as households (average 5 family members) with per capita consumption expenditure of INR 672.8 or less on a monthly basis in rural areas and INR 859.6 or less in urban areas at prices prevailing in 2009-10 (Planning Commission; Government of India, 2012).<br>Categorized as '1' BPL certificate/ self-certified, '2' Not BPL and '3' Not known. |
| Employment                           |                     | Husbands who provided details of their occupation were categorized as '1' 'Employed' and without occupation as 0 'Unemployed'.<br>Women in paid employment 1 'Yes' and 2 'No'.                                                                                                                                                                                                                                                                                      |
| Education                            |                     | Women's and husband's level of education was originally categorized into '1' Illiterate, '2' Literate upto 5th class, '3' 6th to 12th class, '4' Beyond 12th class, '99' Not known.<br>This was combined to generate a binary variable categorised as '1' Illiterate and primary and '2' Secondary and higher.                                                                                                                                                      |
| Smoking                              |                     | Originally '1' Never, '2' gave up prior to pregnancy, '3' current and '4' gave up during pregnancy.<br>Combined to generate a binary variable '0' Never, '1' Current or in the past.                                                                                                                                                                                                                                                                                |
| Tobacco consumption                  |                     | Originally '1' Never, '2' gave up prior to pregnancy, '3' current and '4' gave up during pregnancy.                                                                                                                                                                                                                                                                                                                                                                 |



|                         |                                     |                                                                                                                                                                                                                                                                                                                                                                                                                                                                                                                                                                                                                                                                                                                                                                                                                                                                                                                                                                                                                                                                                                                                                                                                                                                                                                                                                   |
|-------------------------|-------------------------------------|---------------------------------------------------------------------------------------------------------------------------------------------------------------------------------------------------------------------------------------------------------------------------------------------------------------------------------------------------------------------------------------------------------------------------------------------------------------------------------------------------------------------------------------------------------------------------------------------------------------------------------------------------------------------------------------------------------------------------------------------------------------------------------------------------------------------------------------------------------------------------------------------------------------------------------------------------------------------------------------------------------------------------------------------------------------------------------------------------------------------------------------------------------------------------------------------------------------------------------------------------------------------------------------------------------------------------------------------------|
|                         |                                     | Combined to generate a binary variable '0' Never, '1' Current or in the past.                                                                                                                                                                                                                                                                                                                                                                                                                                                                                                                                                                                                                                                                                                                                                                                                                                                                                                                                                                                                                                                                                                                                                                                                                                                                     |
| Alcohol consumption     |                                     | Originally '1' Never, '2' gave up prior to pregnancy, '3' current and '4' gave up during pregnancy.<br>Combined to generate a binary variable '0' Never, '1' Current or in the past.                                                                                                                                                                                                                                                                                                                                                                                                                                                                                                                                                                                                                                                                                                                                                                                                                                                                                                                                                                                                                                                                                                                                                              |
| Chewing betel nut       |                                     | Originally '1' Never, '2' gave up prior to pregnancy, '3' current and '4' gave up during pregnancy.<br>Combined to generate a binary variable '0' Never, '1' Current or in the past.                                                                                                                                                                                                                                                                                                                                                                                                                                                                                                                                                                                                                                                                                                                                                                                                                                                                                                                                                                                                                                                                                                                                                              |
| Consumes fermented fish |                                     | 1' Yes and 2 'No'                                                                                                                                                                                                                                                                                                                                                                                                                                                                                                                                                                                                                                                                                                                                                                                                                                                                                                                                                                                                                                                                                                                                                                                                                                                                                                                                 |
|                         | Cardio-vascular problems            | Cardio-vascular problems is a composite variable comprising of women with cardiac problems and hypertensive disorders. '0' no cardio-vascular problem and '1' cardio-vascular problem/s present.<br>Cardiac problems included rheumatic heart disease, pulmonary oedema, dilated cardiomyopathy, myocarditis in shock, and peripartum cardiomyopathy.<br>Hypertensive disorders included eclampsia, pre-eclampsia, and pregnancy induced hypertension.                                                                                                                                                                                                                                                                                                                                                                                                                                                                                                                                                                                                                                                                                                                                                                                                                                                                                            |
|                         | Deranged LFTs                       | Deranged LFTs (Liver Function Tests) was a composite variable for any deranged liver function parameters i.e. deranged AST/SGOT (Aspartate aminotransferase/ Serum glutamic-oxaloacetic transaminase), deranged ALT/ SGPT (Alanine transaminase/ Serum glutamic pyruvic transaminase), deranged GGTP (Gamma-glutamyl transpeptidase), deranged bilirubin, deranged ALP (Alkaline phosphatase) and deranged albumin. If the level of a parameter was higher than the recommended cut-off levels in pregnancy [14] it was considered as deranged coded as '1' and normal coded as '0':<br><br><ul style="list-style-type: none"> <li>• AST/SGOT &gt;30 U/L was considered elevated and abnormal coded as '1' and &lt;=30 coded '0',</li> <li>• ALT/SGPT &gt; 32 U/L was considered elevated and abnormal coded as '1' and &lt;=32 coded '0',</li> <li>• Bilirubin total &gt; 14 mg/dL was considered elevated and abnormal coded as '1' and &lt;=14 coded '0',</li> <li>• GGTP &gt; 41U/L was considered elevated and abnormal coded as '1' and &lt;=41 coded '0',</li> <li>• ALP &gt; 418 U/L was considered elevated and abnormal coded as '1' and &lt;=418 coded '0'.</li> <li>• Albumin &gt; 37 g/dL was considered elevated and abnormal coded as '1' and &lt;=37 coded '0'.</li> </ul> Each parameter was also used as a continuous variable. |
|                         | Respiratory problems                | The variable 'respiratory problems' was coded '1' Yes and '0' No. Respiratory distress, tachypnea, shortness of breath, bronchial asthma, breathing difficulty were included.                                                                                                                                                                                                                                                                                                                                                                                                                                                                                                                                                                                                                                                                                                                                                                                                                                                                                                                                                                                                                                                                                                                                                                     |
|                         | Low antenatal haemoglobin / anaemia | Pregnant/ postpartum women who had haemoglobin level < 10g/dL during their first antenatal check-up were considered to have low haemoglobin and anaemic whereas those with >= 10g/dL were considered to have normal level of haemoglobin and non-anaemic [15].                                                                                                                                                                                                                                                                                                                                                                                                                                                                                                                                                                                                                                                                                                                                                                                                                                                                                                                                                                                                                                                                                    |
|                         | Maternal complications              | Mortality, postpartum haemorrhage and sepsis were considered as maternal complications.                                                                                                                                                                                                                                                                                                                                                                                                                                                                                                                                                                                                                                                                                                                                                                                                                                                                                                                                                                                                                                                                                                                                                                                                                                                           |

|  |                                  |                                                                                                                                                                                                                                                                                                                                                                                                                                                                                                                                                                                                                                                                                                                                            |
|--|----------------------------------|--------------------------------------------------------------------------------------------------------------------------------------------------------------------------------------------------------------------------------------------------------------------------------------------------------------------------------------------------------------------------------------------------------------------------------------------------------------------------------------------------------------------------------------------------------------------------------------------------------------------------------------------------------------------------------------------------------------------------------------------|
|  |                                  | <p>Mortality '1' woman died, '2' woman alive at six weeks postpartum follow-up, '99' not known</p> <p>Postpartum haemorrhage – reported by the clinician</p> <p>Sepsis – reported by the clinician</p>                                                                                                                                                                                                                                                                                                                                                                                                                                                                                                                                     |
|  | Adverse infant or fetal outcomes | <p>The composite variable adverse infant or fetal outcomes was constructed combining individual variables: stillbirth, admission to NICU, low birth weight (&lt;2500gm) and premature gestational age at delivery.</p> <p>Stillbirth was categorized as '0' Born alive and '1' Still born'.</p> <p>Admission to NICU '1' for admitted to neonatal unit and '2' for not admitted.</p> <p>Birth weight of babies born at term was considered low '1' if &lt;2500 gm and '0' normal weight if &gt;= 2500gm.</p> <p>Babies born at &lt; 37 weeks' gestation were coded as '1' preterm birth and &gt;= 37 weeks' gestation as '0' term birth.</p> <p>Infant mortality coded '1' for died and '2' for alive at 6 weeks postpartum follow-up.</p> |

## 172 **Methodology for Geographical Information System (GIS)**

### 173 **mapping of the seropositive women**

174 The geographical coordinates of residences of seropositive pregnant women were imported  
 175 into the QGIS 3.16 software and mapped to analyse the environmental exposure of the  
 176 seropositive pregnant/ postpartum women [16]. The geographical coordinates were accessed  
 177 with the help of Google maps using the participants' residence addresses. The base layer and  
 178 administrative boundary maps of India were obtained from <https://www.diva-gis.org/gdata>  
 179 [17] and the CRS (coordinate reference system) used for mapping was EPSG:4326 WGS84  
 180 (World Geodetic System 1984). The digital elevation map (DEM) was a raster layer while  
 181 other base layers were vector, and the data was imported to QGIS in a version of delimited text  
 182 layer.

### 183 **Statistical Analysis**

184 The *Leptospira* seropositivity rate with 95% CI (confidence interval) in pregnant/ postpartum  
 185 women in the study population was calculated as:

186 Prevalence rate of seropositive women =  $\frac{\text{Total number of women testing positive for } \textit{Leptospira} \text{ antibodies}}{\text{Total number of women in the study population}} \times 100$

187 Categorical and binary independent variables were expressed as frequency and percentages and  
188 their proportions were compared between seropositive and seronegative groups. Fisher's Exact  
189 test was used to examine whether the difference in proportions were statistically significant.  
190 Continuous independent variables were expressed as median with interquartile ranges and  
191 compared between the two groups. Wilcoxon rank-sum non-parametric test for difference in  
192 median was used to ascertain statistically significant difference in characteristics between the  
193 two groups.

194

195 All statistical tests were considered to be significant at a two-tailed p-value of 10%. The  
196 significance level was determined apriori to be 10% considering the small sample size. All  
197 analyses were performed using STATA version 17 [18].

198

## 199 **Patient and public engagement**

200 The MaatHRI collaboration has a community engagement and involvement (CEI) group. The  
201 studies undertaken by the collaboration, including this study, receive regularly input and  
202 suggestions from the CEI group. The group is also involved in dissemination of the study  
203 outcomes.

204

## 205 **Results**

206 As shown in the flow chart (Fig 1), the random study population of pregnant/ postpartum  
207 women for whom *Leptospira* antibody tests was conducted was 170. Prevalence rate was  
208 calculated for the entire sample and GIS mapping was done for all seropositive participants.

209 Three participants did not have any clinical data and were therefore excluded from the other  
210 analyses. Analysis of fetal/infant complications was restricted to 159 singleton pregnancies (8  
211 multiple pregnancies were excluded).

212

213 **Fig 1. Flow chart of the study data**

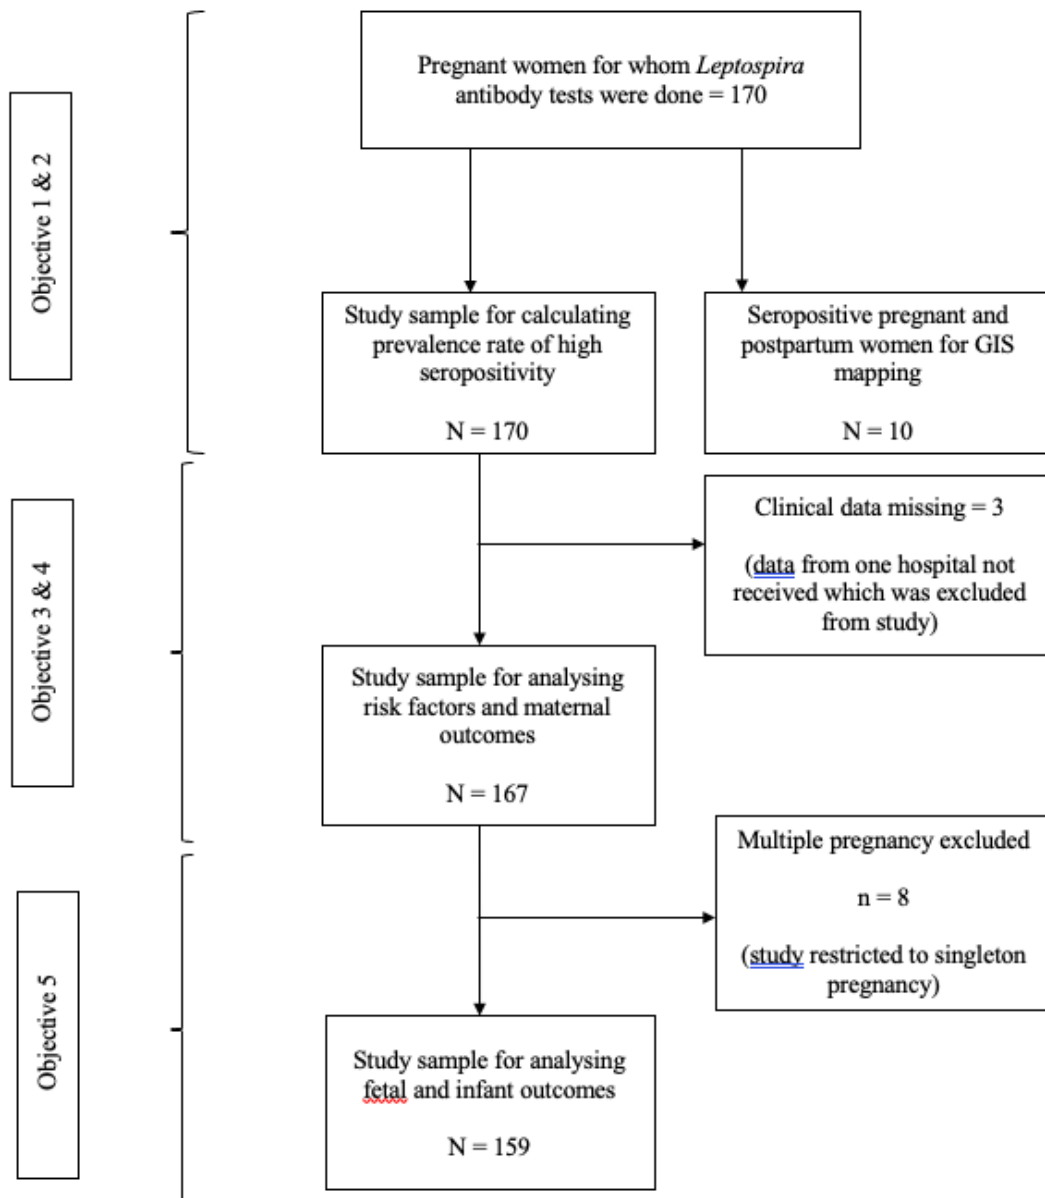

214

## 215 Prevalence of leptospirosis and geographical mapping of 216 seropositive cases in the study population in India

217 Among 170 women who underwent the IgM and IgG ELISA tests, 10 were determined as  
218 seropositive for *Leptospira* antibody. Thus, the overall calculated prevalence was 5.9%, 95%  
219 CI 2.85-10.55%, 4.11% for recent infection (n=7), 2.94% for previous infection (n=5) and two  
220 cases had high levels of both IgM and IgG antibodies.

221

222 Figure-2 presents the geographical mapping of the distribution of seropositive cases across  
223 northern India. From the plotted coordinates of the residences of seropositive women about  
224 80% of the seropositive cases were observed to live near a river or natural water sources,  
225 specifically near the river-basins of the Brahmaputra river. The digital elevation map (DEM)  
226 in Figure-3 clearly demonstrates the seropositive cases inhabiting the river-basins and the  
227 lowlands.

228 **Fig 2. Geographical distribution of seropositive cases for leptospirosis infection**

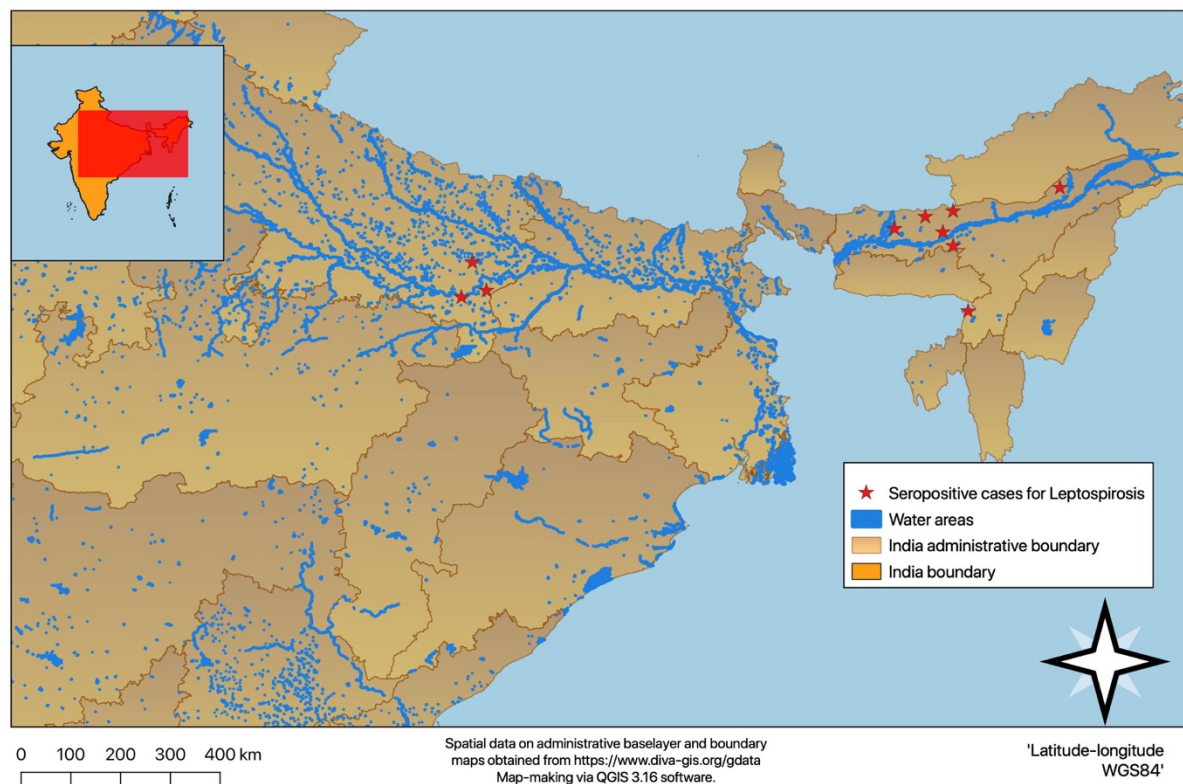

229

230

231 **Fig 3. Distribution of seropositive cases for leptospirosis on a digital elevation map**

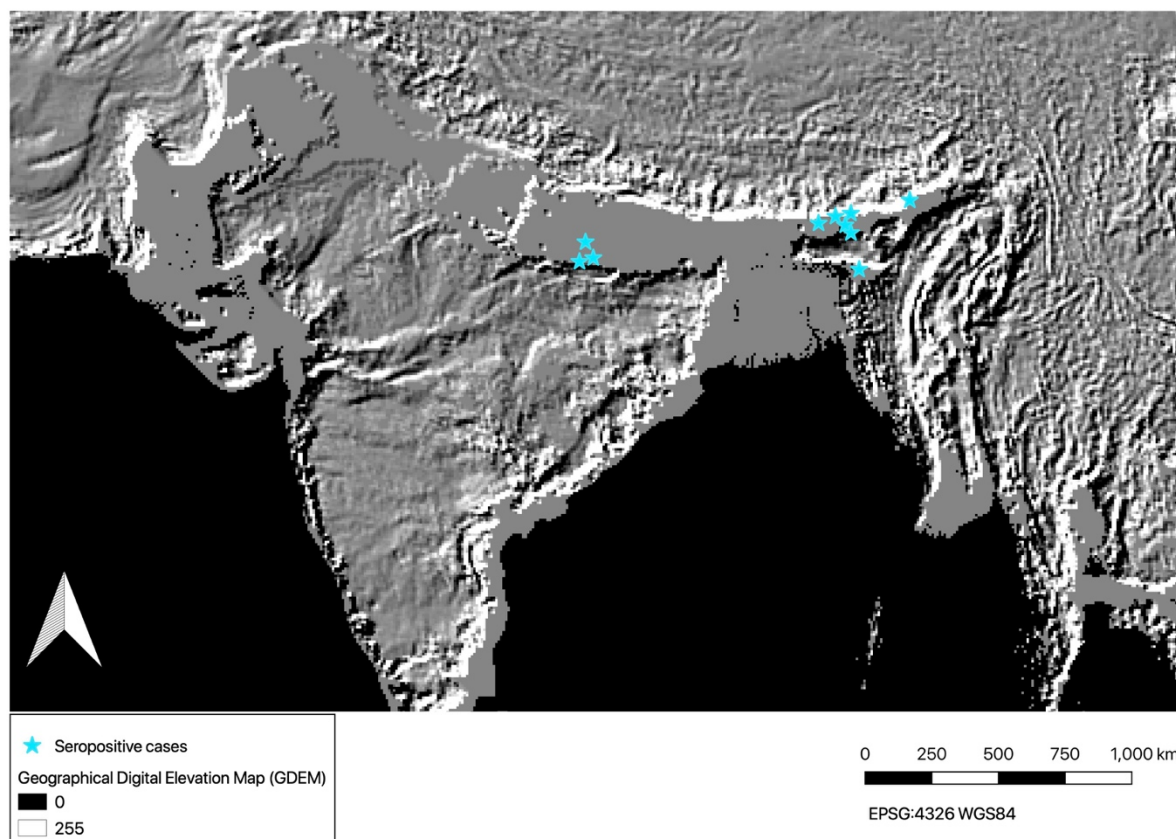

232

### 233 **Socioeconomic, demographic, and behavioural characteristics**

234 None of the socioeconomic, demographic or behavioural characteristics were found to be  
235 statistically significantly different between the seropositive and seronegative groups (Table-2)  
236 but there were marked differences in proportion of some factors. Majority of seropositive  
237 women i.e., 90% lived in rural areas whereas this was 75.8% in the seronegative group, and  
238 80% of the seropositive group followed Hinduism. Median age of women was comparable for  
239 both groups. None of the women in the study population were reported to smoke or consume  
240 alcohol or use tobacco. The proportion of women who currently chewed or had a history of  
241 chewing betel nut was 50% for the seropositive group which was higher than 33.1% in the  
242 seronegative group, although not statistically significant.



243 **Table 2. Socioeconomic, demographic and behavioral characteristics of the study**  
244 **population**

| Total sample of pregnant women (N) = 167                  |                            |                     |                     |                  |
|-----------------------------------------------------------|----------------------------|---------------------|---------------------|------------------|
| Socioeconomic, demographic & behavioural characteristics: |                            | Seropositive women  | Seronegative women  | P-value*         |
|                                                           |                            | n = 10              | n = 157             |                  |
|                                                           |                            | n (%)               |                     |                  |
| Residence                                                 |                            |                     |                     | 0.46             |
|                                                           | Rural                      | 9 (90.0 %)          | 119 (75.8 %)        |                  |
|                                                           | Urban                      | 1 (10.0%)           | 38 (24.2 %)         |                  |
| Religion                                                  |                            |                     |                     | 0.50             |
|                                                           | Hindu                      | 8 (80.0%)           | 102 (65.0%)         |                  |
|                                                           | Muslim, Christian & others | 2 (20.0%)           | 55 (35.0%)          |                  |
| Poor                                                      |                            |                     |                     | 0.44             |
|                                                           | BPL                        | 4 (40.0%)           | 90 (57.3%)          |                  |
|                                                           | not BPL                    | 5 (50.0%)           | 55 (35.0%)          |                  |
|                                                           | not known                  | 1 (10.0%)           | 12 (7.6)            |                  |
| Women's education level                                   |                            |                     |                     | 0.69             |
|                                                           | Illiterate & primary       | 2 (20.0%)           | 27 (17.2%)          |                  |
|                                                           | Secondary & higher         | 8 (80.0%)           | 130 (82.8%)         |                  |
| Husband's education level                                 |                            |                     |                     | 0.21             |
|                                                           | Illiterate & primary       | 0 (0.0%)            | 30 (19.1%)          |                  |
|                                                           | Secondary & higher         | 10 (100.0%)         | 127 (80.9%)         |                  |
| Chewing betel nut                                         |                            |                     |                     | 0.31             |
|                                                           | Current or has history     | 5 (50.0%)           | 52 (33.1%)          |                  |
|                                                           | Never                      | 5 (50.0%)           | 105 (66.9%)         |                  |
| Consumes fermented fish                                   |                            |                     |                     | 0.29             |
|                                                           | Yes                        | 5 (50.0%)           | 109 (69.4%)         |                  |
|                                                           | No                         | 5 (50.0%)           | 48 (30.6%)          |                  |
|                                                           |                            | <b>Median (IQR)</b> | <b>Median (IQR)</b> | <b>P-value**</b> |
| Age (in years)                                            |                            | 25 (5)              | 24 (6)              | 0.71             |

245 \* P-value Fishers Exact test for categorical variables

246 \*\* P-value Rank-sum test for continuous variable

247 P-value < 0.10 (10% significance level)

248 IQR – Interquartile range; BPL – below poverty line

## 249 **Clinical Characteristics**

250 Clinical characteristics of the seropositive and seronegative women are presented in Table-3.

251 A significantly higher proportion (70%) of the seropositive women were reported to have  
252 cardio-vascular problems compared with 32.5% in the seronegative group (p-value of 0.03).

253 On further examining the individual components of the composite variable, a higher proportion  
254 of seropositive women had co-existing cardiac problems (60%) compared with 47% in the  
255 seronegative group (p-value 0.08). Similarly, proportion of co-existing hypertensive disorders  
256 of pregnancy was higher in the seropositive group (40%) compared with the seronegative group  
257 (16%) at a p-value of 0.07.

258

259 Although not significantly different at  $p < 0.1$ , the proportion of women with deranged LFT  
260 (Liver Function Test) was higher in the seropositive group (80%) compared with 64% in the  
261 seronegative group. The median levels of all individual parameters included in the composite  
262 deranged LFT variable were found to be elevated in the seropositive group compared with the  
263 seronegative group, but these were not statistically significantly different. The median  
264 antenatal Hb (Haemoglobin) level was 9.2 g/dl in seropositive group of pregnant and  
265 postpartum women compared with 10.2 g/dl in women who were seronegative ( $p = 0.04$ ), thus  
266 a higher proportion of the seropositive women had antenatal anaemia compared with the  
267 seronegative group. Respiratory problems were reported in 10% of the seropositive women  
268 and 8.3% among seronegative women ( $p = 0.59$ ).

269

270 None of the women in the seropositive group died but 3 maternal deaths were reported in the  
271 seronegative group and 1 from seronegative group reported to have sepsis. No woman was  
272 reported to have a postpartum haemorrhage.



273 **Table 3. Clinical characteristics of the study population**

| Total sample of pregnant women (N) = 167   |               |                     |                     |                  |
|--------------------------------------------|---------------|---------------------|---------------------|------------------|
| Clinical characteristics:                  |               | Seropositive women  | Seronegative women  | P-value*         |
|                                            |               | n = 10              | n = 157             |                  |
|                                            |               | n (%)               | n (%)               |                  |
| <b>Cardio-vascular problems ‡</b>          |               |                     |                     | 0.03             |
|                                            | Yes           | 7 (70.0%)           | 51 (32.5%)          |                  |
|                                            | No            | 3 (30.0%)           | 106 (67.5%)         |                  |
| <b>Cardiac problems</b>                    |               |                     |                     | 0.08             |
|                                            | Yes           | 6 (60.0%)           | 47 (29.9%)          |                  |
|                                            | No            | 4 (40.0%)           | 110 (70.1%)         |                  |
| <b>Hypertensive disorders in pregnancy</b> |               |                     |                     | 0.07             |
|                                            | Yes           | 4 (40.0%)           | 25 (15.9%)          |                  |
|                                            | No            | 6 (60.0%)           | 132 (84.1%)         |                  |
| <b>Deranged LFTs ‡</b>                     |               |                     |                     | 0.5              |
|                                            | Yes           | 8 (80.0%)           | 100 (63.7%)         |                  |
|                                            | No            | 2 (20.0%)           | 57 (36.3%)          |                  |
| <b>Deranged AST</b>                        |               |                     |                     | 0.2              |
|                                            | Yes           | 8 (80.0%)           | 90 (57.3%)          |                  |
|                                            | No            | 2 (20.0%)           | 67 (42.7%)          |                  |
| <b>Deranged ALT</b>                        |               |                     |                     | 0.28             |
|                                            | Yes           | 4 (40.0%)           | 39 (24.8%)          |                  |
|                                            | No            | 6 (60.0%)           | 118 (75.2%)         |                  |
| <b>Deranged GGTP</b>                       |               |                     |                     | 0.32             |
|                                            | Yes           | 2 (20.0%)           | 17 (10.8%)          |                  |
|                                            | No            | 8 (80.0%)           | 140 (89.2%)         |                  |
| <b>Anaemia</b>                             |               |                     |                     | 0.09             |
| (Hb < 10g / dL)                            | Yes           | 7 (70.0%)           | 58 (37.9%)          |                  |
|                                            | No            | 3 (30.0%)           | 95 (62.1%)          |                  |
|                                            | missing       |                     | 4                   |                  |
| <b>Respiratory Problems</b>                |               |                     |                     | 0.59             |
|                                            | Yes           | 1 (10.0%)           | 13 (8.3%)           |                  |
|                                            | No            | 9 (90.0%)           | 144 (91.7%)         |                  |
|                                            |               | <b>Median (IQR)</b> | <b>Median (IQR)</b> | <b>P-value**</b> |
| <b>Liver Function Parameters:</b>          |               |                     |                     |                  |
|                                            | ASTSGOT (U/L) | 48.5 (26)           | 37 (44)             | 0.29             |
|                                            | ALTSGPT (U/L) | 21.5 (36)           | 18 (21)             | 0.49             |
|                                            | GGTP (U/L)    | 21 (25)             | 17 (20)             | 0.53             |

|                            |                             |             |            |      |
|----------------------------|-----------------------------|-------------|------------|------|
|                            | ALP (U/L)                   | 222.5 (112) | 209 (121)  | 0.93 |
|                            | Bilirubin (mg/dL)           | 0.195 (0.1) | 0.2 (0.11) | 0.94 |
|                            | Albumin (g/dL)              | 2.68 (0.68) | 2.7 (0.82) | 0.97 |
| <b>Haemoglobin in g/dl</b> |                             |             |            |      |
|                            | Antenatal Haemoglobin level | 9.2 (2)     | 10.2 (2)   | 0.04 |
|                            | missing                     |             | 4          |      |

274 \* P-value Fishers Exact test for categorical variables  
 275 \*\* P-value Rank-sum test for continuous variable  
 276 P-value < 0.10 (10% significance level)  
 277 ‡ Composite variable  
 278 Missing data were not included in the calculation of percentages and median  
 279 IQR – interquartile range

280

## 281 Fetal and infant outcomes

282 The proportion of adverse infant/ fetal outcomes was significantly higher in the seropositive  
 283 group compared with the seronegative group at p-value of 0.08 (Table-4). There was one loss  
 284 of pregnancy in the seropositive group, the reason for which was not known, and no infant died  
 285 among women with singleton pregnancies.

286 **Table 4. Infant and fetal outcomes of the study population restricting to singleton**  
 287 **pregnancies**

| Total sample of pregnant women (N) = 159 |         |                    |                    |          |
|------------------------------------------|---------|--------------------|--------------------|----------|
| Infant and fetal outcomes                |         | Seropositive women | Seronegative women | P-value* |
|                                          |         | n = 9              | n = 150            |          |
|                                          |         | n (%)              |                    |          |
| Adverse infant/fetal outcomes ‡          |         |                    |                    | 0.08     |
|                                          | Yes     | 7 (87.5%)          | 78 (54.2%)         |          |
|                                          | No      | 1 (12.5%)          | 66 (45.8%)         |          |
|                                          | missing | 1                  | 6                  |          |
| Stillbirth                               |         |                    |                    |          |
|                                          | Yes     | 1 (12.5%)          | 5 (3.5%)           | 0.28     |
|                                          | No      | 7 (87.5%)          | 139 (96.5%)        |          |
|                                          | missing | 1                  | 6                  |          |
| Admission to NICU                        |         |                    |                    | 0.03     |
|                                          | Yes     | 4 (57.1%)          | 24 (17.3%)         |          |

|                                      |         |                     |                     |                  |
|--------------------------------------|---------|---------------------|---------------------|------------------|
|                                      | No      | 3 (42.9%)           | 115 (82.7%)         |                  |
|                                      | missing | 2                   | 11                  |                  |
| Low birth weight (< 2500 gm)         |         |                     |                     | 1.00             |
|                                      | Yes     | 4 (50.0%)           | 64 (44.4%)          |                  |
|                                      | No      | 4 (50.0%)           | 80 (55.6%)          |                  |
|                                      | missing | 1                   | 6                   |                  |
| Preterm birth (<37 weeks' gestation) |         |                     |                     | 0.22             |
|                                      | Yes     | 4 (50.0%)           | 39 (27.1%)          |                  |
|                                      | No      | 4 (50.0%)           | 105 (72.9%)         |                  |
|                                      | missing | 1                   | 6                   |                  |
|                                      |         | <b>Median (IQR)</b> | <b>Median (IQR)</b> | <b>P-value**</b> |
| Median birth weight                  |         | 2455.5 (882.5)      | 2600 (649)          | 0.28             |
|                                      | missing | 1                   | 6                   |                  |
|                                      |         |                     |                     |                  |
|                                      |         |                     |                     |                  |
| Median gestational age at delivery   |         | 36.4 (3.4)          | 39 (3.9)            | 0.12             |
|                                      | missing | 1                   | 6                   |                  |

288 \* P-value Fishers exact for categorical

289 \*\* P-value Rank-sum for continuous variable

290 P-value < 0.10 (10% significance level)

291 ‡ Composite variable

292 Missing data were not included in the calculation of percentages and median

293

294 A summary of the clinical characteristics, co-morbidities, maternal and fetal outcomes of the  
 295 seropositive women are presented in Table-5. IgM was higher in seven women suggesting  
 296 acute infection and three women had high IgG and can be considered to be in convalescent  
 297 phase. A majority of the women had high AST (8 out of 10) and low haemoglobin (7 of 10).  
 298 Comorbidities were reported as cardiac problems in six women and hypertensive disorders in  
 299 pregnancy in four. There was one case of stillbirth and one pregnancy loss due to miscarriage.  
 300 Caesarean section was performed on three women and only one had a twin pregnancy.  
 301 Low birth weight, premature birth and admission of the baby to NICU was common among  
 302 women who were categorised as seropositive in the study population. Seven out of ten  
 303 seropositive women had at least one adverse fetal/infant outcome.

**Table 5. Summary of clinical presentation, comorbidities, maternal and fetal outcomes**

| Seropositive cases* | Blood Parameters |           |          |          |           |                                       | Co-morbidities                                |                           | Pregnancy Outcomes |                   |             |            |             |                         |                     |                      | Infant Outcomes                 |                          |                   |
|---------------------|------------------|-----------|----------|----------|-----------|---------------------------------------|-----------------------------------------------|---------------------------|--------------------|-------------------|-------------|------------|-------------|-------------------------|---------------------|----------------------|---------------------------------|--------------------------|-------------------|
|                     | IgG value        | IgM value | High AST | High ALT | High GGTP | Hb at first antenatal visit (<10g/dl) | Diagnosed hypertensive disorders in pregnancy | Reported cardiac problems | Multiple pregnancy | Caesarean section | Miscarriage | Stillbirth | Mother died | Post-partum haemorrhage | Multi-organ failure | Respiratory problems | Birth weight of infant (<2500g) | Premature birth (<37wks) | Admission to NICU |
| SP-1                | 15               | 0.53      |          |          |           |                                       |                                               | X                         |                    |                   |             |            |             |                         |                     |                      | X                               | X                        | X                 |
| SP-2                | >100             | 0.8       | X        |          |           | X                                     | X                                             | X                         |                    | X                 |             |            |             |                         |                     | X                    |                                 | X                        |                   |
| SP-3                | 25               | 1.1       |          |          |           | X                                     | X                                             | X                         |                    |                   | X           |            |             |                         |                     |                      |                                 |                          |                   |
| SP-4                | 6                | 1.34      | X        | X        |           | X                                     |                                               | X                         |                    | X                 |             |            |             |                         |                     | X                    |                                 |                          | X                 |
| SP-5                | 15               | 1.2       | X        |          |           | X                                     |                                               |                           |                    |                   |             |            |             |                         |                     |                      | X                               |                          |                   |
| SP-6                | 2.6              | 1.14      | X        |          |           | X                                     | X                                             |                           | X                  |                   |             |            |             |                         |                     |                      | X                               | X                        | X                 |
| SP-7                | 3                | 1.12      | X        |          |           |                                       | X                                             | X                         |                    | X                 |             |            |             |                         |                     |                      | X                               | X                        | X                 |
| SP-8                | 2.4              | 1.23      | X        | X        | X         | X                                     |                                               | X                         |                    |                   |             |            |             |                         |                     |                      |                                 |                          |                   |
| SP-9                | 4                | 1.32      | X        | X        |           | X                                     |                                               |                           |                    |                   |             |            |             |                         |                     |                      | X                               | X                        | X                 |
| SP-10               | 16               | 0.33      | X        | X        | X         |                                       |                                               |                           |                    |                   |             | X          |             |                         |                     |                      |                                 |                          |                   |

\* If either IgG >= 15 or IgM >=1.1

SP = Women who had seropositive test for leptospirosis

X = Occurrence of event

## 308 **Discussion**

### 309 **Summary of the findings**

310 The study estimated a prevalence rate of 5.9% for leptospirosis in pregnancy among a north  
311 Indian population. GIS mapping showed that the distribution of majority of seropositive cases  
312 were along the major river Brahmaputra and in the river-basin. Socio-economic factors were  
313 not found to be significantly associated with seropositivity in the study population, but this  
314 could be due to the small sample size. Adverse infant outcomes were common among women  
315 who were seropositive. There was one reported miscarriage and one stillbirth in the  
316 seropositive group, but this number could be higher in a larger population. Admission of infant  
317 to NICU was more frequent for the seropositive mothers compared with the seronegative  
318 mothers. LFTs were raised for the seropositive women, and they were also diagnosed with  
319 antenatal anaemia and cardiovascular problems.

320

### 321 **Prevalence of leptospirosis in pregnancy in northern India**

322 Among the 170 randomly selected pregnant women for whom the IgM and IgG ELISA tests  
323 for *Leptospira* antibodies was performed, 10 tested positive giving a prevalence rate of 5.9%  
324 which is high if we consider the pooled rate of 1.3% from 17 countries reported by Selvarajah  
325 et al [5] in a systematic review of leptospirosis in pregnancy. The review however indicated  
326 that the number could be higher in endemic regions considering that the incidence rate in a  
327 study from Mexico was reported to be 13.6% [5,19].

328

### 329 **Diagnosis of leptospirosis in pregnancy**

330 India is an endemic area for leptospirosis infection and as per WHO recommendation, the local  
331 laboratory cut-offs for titres of antibodies IgM and IgG were used to decide on high

332 seroprevalence [20]. There are several diagnostic methods for testing seroprevalence of  
333 antibodies such as MAT (microscopic agglutination test); culture of blood, urine, tissues, and  
334 cerebrospinal fluid; polymerase chain reaction (PCR) and ELISA. Leptospirosis is confirmed  
335 by an increase in IgM antibody titres in the acute or initial phase of the disease indicating a  
336 current or recent infection [1,9,12,21]. However, the IgM titres produced in the first week of  
337 infection can remain for months to years raising question on whether its detection confirms  
338 acute or recent infection. WHO recommends MAT as a confirmatory test after detection of  
339 antibodies for leptospirosis through ELISA, which was not done in our study population.  
340 Nevertheless, ELISA is considered the best pragmatic method as it is a rapid test, is easily  
341 available, has better sensitivity and specificity and does not require expert knowledge in  
342 handling samples and performing tests. In pregnancy, leptospirosis infection could have serious  
343 consequences for both the mother and the fetus if not diagnosed early and left untreated [5].  
344 Therefore, early detection through ELISA could be an affordable and pragmatic screening test  
345 for women suspected to have an infection in the endemic areas. However, the challenge  
346 currently seems to be non-inclusion of leptospirosis as a differential diagnosis for women who  
347 present with features of AFLP and HELLP even in endemic areas [5].

348

## 349 **Geographical distribution of the leptospirosis cases in the study**

### 350 **region**

351 The majority of the women who tested positive were found to live in the river basin of a large  
352 river called ‘Brahmaputra’ in the Northeastern part of India where flood hazard is a major  
353 problem. This region is also famous for having the heaviest rainfall in the world [22,23]. Rain  
354 washes off the topsoil during floods creating neutral and alkaline soil which facilitates the  
355 growth and survival of *Leptospire*s in the environment. The *Leptospire*s thrive in fresh water  
356 and in moist alkaline soil for weeks to years increasing the rate of transmission among both

357 humans and animals. The groundwater used for drinking and other daily activities in the region  
358 also come from the same water table exposing the residents to the bacteria. Leptospirosis is  
359 well-known to be a water-borne disease but the bioburden of pathogens in the soil is often  
360 underestimated, which transmits to humans via skin [1]. The geospatial distribution in our  
361 study population suggests that environmental exposure could be one of the vital risk factors for  
362 leptospirosis among the study population.

363

### 364 **Risk factors for leptospirosis in pregnancy**

365 Several studies conducted in low- and middle-income countries (LMICs) have found  
366 socioeconomic and demographic risk factors to be associated with leptospirosis, but in our  
367 study, these characteristics were not different between the seropositive and seronegative  
368 pregnant and postpartum women. This could be due to small sample size of the study. Pregnant  
369 and postpartum women residing in the rural areas and from Hindu religious background  
370 appeared to be more prone to the infection, but this could be because a majority of the women  
371 in the study area lived in rural regions and followed Hinduism. Smoking, consuming alcohol  
372 and tobacco, chewing betel nut were also not found to be higher among seropositive women.  
373 There was also no association between hygiene and seropositivity which is in contrast to Cook  
374 et al's [21] study that found leptospirosis to be related to personal hygiene factors due to a  
375 greater risk of transmission.

376

### 377 **Clinical characteristics of leptospirosis in the study population of** 378 **pregnant and postpartum women**

379 Frequency of cardiac involvement in leptospirosis is underreported and often leptospirosis is  
380 not suspected to be a cause for cardiovascular complications as various other factors could

381 induce this. Studies show mortality resulting from acute renal failure, acute respiratory distress  
382 syndrome and pulmonary haemorrhage to be associated with leptospirosis, but heart failure is  
383 also observed in severe cases of leptospirosis and there is evidence to support this in post-  
384 mortem studies of patients who died due to leptospirosis [24]. A study on leptospirosis outbreak  
385 in 2008 in Sri Lanka reported patients with heart failure and myocarditis [25]. In our study,  
386 prevalence of cardiovascular problems including cardiac problems and hypertensive disorders  
387 in pregnancy were observed to be higher in seropositive women compared with seronegative  
388 women. Further, the median level of AST from the liver function tests was higher in the  
389 seropositive cases and a majority of the women who had elevated levels of AST also had  
390 elevated levels of IgM antibodies. This might be an indicator of an acute infection phase of  
391 leptospirosis. Haemoglobin level less than 10g/ dL was observed in 70% of the women who  
392 tested positive for leptospirosis which is consistent with the findings from a study by Edmond  
393 Puca et al. who found haemolytic anaemia to be associated with leptospirosis infection in  
394 humans [26]. Although iron deficiency and haemoglobinopathies were the main cause of  
395 anaemia in our study population, we do not know whether any of the participants had  
396 haemolytic anaemia. Studies have reported pulmonary haemorrhage and respiratory distress  
397 syndrome as an outcome of leptospirosis, but this was not observed in our study population.  
398 As reported in the systematic review of leptospirosis in pregnancy [5] and other studies [27,28],  
399 a significantly higher proportion of seropositive women in our study population had adverse  
400 fetal outcomes compared with the seronegative women. Leptospirosis in pregnancy resulted in  
401 lower median birth weight and preterm delivery. NICU admissions of infants was more  
402 frequent for seropositive mothers compared with seronegative mothers. There was one reported  
403 miscarriage and one stillbirth, but maternal death or complications such as postpartum  
404 haemorrhage was not observed to be higher among seropositive women.

405



## 406 **Strengths and limitations**

407 This is the first study in India describing the epidemiology of leptospirosis among pregnant  
408 and postpartum women. Geographical mapping and analyses of the data generates important  
409 hypotheses about the distribution of the cases, transmission risk, clinical characteristics, and  
410 outcomes of leptospirosis in pregnancy suggesting the urgent need for further research.

411 A major limitation of this study is the small sample size which limited the study power and  
412 therefore the ability to undertake further statistical analyses. However, it is important to  
413 acknowledge that leptospirosis in pregnancy is not common and a majority of the studies  
414 published till date are case reports or case series. Furthermore, although ELISA tests are  
415 antibody specific, the risk of contamination or high titres due to other infections cannot be  
416 ignored. Infections such as malaria, dengue or other unknown infections could have influenced  
417 the ELISA detected antibodies [29], although the chances of this is low as there was no reported  
418 infections in the clinical data collected from the participants' hospital records.

419

## 420 **Conclusions**

421 Leptospirosis has been recognised as a Neglected Zoonotic Disease (NZD) by the WHO as this  
422 affects the livelihoods of those infected along with their health, perpetuating poverty [30] .

423 Despite being an NZD and given the complex epidemiological pattern of the disease, there still  
424 remains a lack of focus on policies and strategies for prevention and control of leptospirosis  
425 and the global burden is high [31]. This hypothesis generating study showed that the prevalence  
426 rate of leptospirosis in pregnancy could be higher than that estimated in previous studies and  
427 therefore there is a requirement for more research and epidemiological surveillance of  
428 leptospirosis in pregnancy and in the general population. ELISA tests for IgM and IgG  
429 antibodies could be used to screen pregnant women during their routine antenatal check-ups in  
430 endemic regions, particularly those who present with non-differential febrile illness. Pregnant

431 women presenting with high blood pressure are diagnosed as having hypertensive disorders of  
432 pregnancy with leptospirosis not being suspected as a differential diagnosis. This study  
433 suggests that in endemic areas it is important to investigate leptospirosis infection as a  
434 differential diagnosis to initiate appropriate treatment to avoid adverse pregnancy and fetal  
435 outcomes. Even though our study did not find socio-economic characteristics to be  
436 significantly different between the seropositive and seronegative groups, likely due to a small  
437 sample size, clinicians and public health professionals should not ignore the role played by  
438 these factors in increasing the risk of leptospirosis. Leptospirosis in pregnancy can be prevented  
439 and clinically managed through proper awareness and education of the general population and  
440 health professionals. However, a key first step is to include leptospirosis in the list of  
441 differential diagnosis of febrile illness and hypertensive disorders during pregnancy.

442

## 443 **Acknowledgements**

444 We thank the study participants for their willingness to participate in the study. We thank the  
445 MaatHRI field team for collecting the data. We also thank Dr Sinaida Cherubin, who provided  
446 help to the first author in understanding the data.

447

## 448 **Reference list**

- 449 1. Karpagam KB, Ganesh B. Leptospirosis: a neglected tropical zoonotic infection of  
450 public health importance—an updated review. *Eur J Clin Microbiol Infect Dis*.  
451 2020;39: 835–846. doi:10.1007/S10096-019-03797-4/TABLES/1
- 452 2. Costa F, Hagan JE, Calcagno J, Kane M, Torgerson P, Martinez-Silveira MS, et al.  
453 Global Morbidity and Mortality of Leptospirosis: A Systematic Review. *PLoS Negl*  
454 *Trop Dis*. 2015;9: e0003898. doi:10.1371/JOURNAL.PNTD.0003898

- 455 3. Torgerson PR, Hagan JE, Costa F, Calcagno J, Kane M, Martinez-Silveira MS, et al.  
456 Global Burden of Leptospirosis: Estimated in Terms of Disability Adjusted Life Years.  
457 PLoS Negl Trop Dis. 2015;9. doi:10.1371/journal.pntd.0004122
- 458 4. Abela-Ridder B, Sikkema R, Hartskeerl RA. Estimating the burden of human  
459 leptospirosis. *Int J Antimicrob Agents*. 2010;36: S5–S7.  
460 doi:10.1016/J.IJANTIMICAG.2010.06.012
- 461 5. Selvarajah S, Ran S, Roberts NW, Nair M. Leptospirosis in pregnancy: A systematic  
462 review. *PLoS Negl Trop Dis*. 2021;15: e0009747.  
463 doi:10.1371/JOURNAL.PNTD.0009747
- 464 6. Izurieta R, Galwankar S, Clem A. Leptospirosis: The “mysterious” mimic. *J*  
465 *Emergencies, Trauma Shock*. 2008;1: 21. doi:10.4103/0974-2700.40573
- 466 7. Center for Disease Control and Prevention (CDC). Leptospirosis. In: CDC [Internet].  
467 2019 [cited 28 Feb 2022]. Available: <https://www.cdc.gov/leptospirosis/index.html>
- 468 8. Day N, DM, FRCP. Leptospirosis: Epidemiology, microbiology, clinical  
469 manifestations, and diagnosis - UpToDate. In: UpToDate [Internet]. 2021 [cited 11  
470 Aug 2021]. Available: [https://www.uptodate.com/contents/leptospirosis-](https://www.uptodate.com/contents/leptospirosis-epidemiology-microbiology-clinical-manifestations-and-diagnosis?search=leptospirosis&source=search_result&selectedTitle=1~79&usage_type=default&display_rank=1)  
471 [epidemiology-microbiology-clinical-manifestations-and-](https://www.uptodate.com/contents/leptospirosis-epidemiology-microbiology-clinical-manifestations-and-diagnosis?search=leptospirosis&source=search_result&selectedTitle=1~79&usage_type=default&display_rank=1)  
472 [diagnosis?search=leptospirosis&source=search\\_result&selectedTitle=1~79&usage\\_ty](https://www.uptodate.com/contents/leptospirosis-epidemiology-microbiology-clinical-manifestations-and-diagnosis?search=leptospirosis&source=search_result&selectedTitle=1~79&usage_type=default&display_rank=1)  
473 [pe=default&display\\_rank=1](https://www.uptodate.com/contents/leptospirosis-epidemiology-microbiology-clinical-manifestations-and-diagnosis?search=leptospirosis&source=search_result&selectedTitle=1~79&usage_type=default&display_rank=1)
- 474 9. Becirovic A, Numanovic F, Dzafic F, Piljic D. Analysis of Clinical and Laboratory  
475 Characteristics of Patients with Leptospirosis in Five-year Period. *Mater Socio*  
476 *Medica*. 2020;32: 15. doi:10.5455/msm.2020.32.15-19
- 477 10. Gainer S, Singla R, Dhaliwal L, Suri V. Leptospirosis as a cause of intrauterine fetal  
478 demise: short report of rare presentation. *Arch Gynecol Obstet* 2009 2816. 2009;281:  
479 1061–1063. doi:10.1007/S00404-009-1266-Y

- 480 11. Nair M, Bezbaruah B, Bora AK, Bora K, Chhabra S, Choudhury SS, et al. Maternal  
481 and perinatal Health Research Collaboration, India (MaatHRI): methodology for  
482 establishing a hospital-based research platform in a low and middle income country  
483 setting. *F1000Research*. 2021;9: 683. doi:10.12688/f1000research.24923.3
- 484 12. Brockmann SO, Ulrich L, Piechotowski I, Wagner-Wiening C, Nöckler K, Mayer-  
485 Scholl A, et al. Risk factors for human *Leptospira* seropositivity in South Germany.  
486 *Springerplus*. 2016;5: 1–8. doi:10.1186/s40064-016-3483-8
- 487 13. Karnik ND, Patankar AS. Leptospirosis in Intensive Care Unit. *Indian J Crit Care*  
488 *Med*. 2021;25: S134. doi:10.5005/JP-JOURNALS-10071-23852
- 489 14. Walker I, Chappell LC, Williamson C. Abnormal liver function tests in pregnancy.  
490 *BMJ*. 2013;347: f6055. doi:10.1136/BMJ.F6055
- 491 15. Nair M, Chhabra S, Choudhury SS, Deka D, Deka G, Kakoty SD, et al. Relationship  
492 between anaemia, coagulation parameters during pregnancy and postpartum  
493 haemorrhage at childbirth: a prospective cohort study. *BMJ Open*. 2021;11: 50815.  
494 doi:10.1136/bmjopen-2021-050815
- 495 16. QGIS Development Team. QGIS Geographic Information System: Version 3.16. 2020.  
496 Available: <https://www.qgis.org>
- 497 17. DIVA-GIS. Download data by country | DIVA-GIS. 2021 [cited 10 May 2022].  
498 Available: <https://www.diva-gis.org/gdata>
- 499 18. StataCorp. Stata Statistical Software: Release 17. College Station, TX: StataCorp LLC;  
500 2021.
- 501 19. Cárdenas-Marrufo MF, Vado-Solis I, Pérez-Osorio C, Peniche-Lara G, Segura-Correa  
502 J. A cross sectional study of leptospirosis and fetal death in Yucatan, Mexico. *Colomb*  
503 *Médica C*. 2016;47: 11. Available: [/pmc/articles/PMC4867511/](https://pubmed.ncbi.nlm.nih.gov/34867511/)
- 504 20. World Health Organization (WHO). Human Leptospirosis: Guidance for Diagnosis,

- 505 Surveillance and Control. World Heal Organ Int Leptospirosis Soc. Geneva; 2003.  
506 Available: [http://whqlibdoc.who.int/hq/2003/WHO\\_CDS\\_CSR\\_EPH\\_2002.23.pdf](http://whqlibdoc.who.int/hq/2003/WHO_CDS_CSR_EPH_2002.23.pdf)).
- 507 21. Cook EAJ, De Glanville WA, Thomas LF, Kariuki S, Bronsvoot BMDC, Fèvre EM.  
508 Risk factors for leptospirosis seropositivity in slaughterhouse workers in western  
509 Kenya. *Occup Environ Med*. 2017;74: 357–365. doi:10.1136/oemed-2016-103895
- 510 22. Murata F, Hayashi T, Matsumoto J, Asada H. Rainfall on the Meghalaya plateau in  
511 northeastern India-one of the rainiest places in the world. *Nat Hazards*. 2007;42: 391–  
512 399. doi:10.1007/S11069-006-9084-Z/FIGURES/7
- 513 23. Saikia L. Flood Hazard of the Brahmaputra River in Assam: Current Mitigation  
514 Approaches, Challenges and Sustainable Solution Options. *Riverine Syst*. 2022; 99–  
515 111. doi:10.1007/978-3-030-87067-6\_6
- 516 24. Jayathilaka PGNS, Mendis ASV, Perera MHMTS, Damsiri HMT, Gunaratne AVC,  
517 Agampodi SB. An outbreak of leptospirosis with predominant cardiac involvement: A  
518 case series. *BMC Infect Dis*. 2019;19: 1–8. doi:10.1186/S12879-019-3905-  
519 7/TABLES/3
- 520 25. Navinan MR, Rajapakse S. Cardiac involvement in leptospirosis. *Trans R Soc Trop*  
521 *Med Hyg*. 2012;106: 515–520. doi:10.1016/J.TRSTMH.2012.06.007
- 522 26. Puca E, Abazaj E, Piperio P, Harxhi A, Ferizaj R, Como N, et al. A case with high  
523 bilirubinemia and hemolytic anemia during leptospirosis and a short review of similar  
524 cases. *Casp J Intern Med*. 2020;11: 441–445. doi:10.22088/cjim.11.4.441
- 525 27. Chedraui PA, San Miguel G. A case of leptospirosis and pregnancy. *Arch Gynecol*  
526 *Obstet*. 2003;269: 53–54. doi:10.1007/s00404-002-0415-3
- 527 28. Rahimi R, Omar E, Soh T, Nawi S, Noor S. Leptospirosis in pregnancy: A lesson in  
528 subtlety. *Malays J Pathol*. 2018;40: 169–73. Available:  
529 <https://pubmed.ncbi.nlm.nih.gov/30173235/>

- 530 29. Pinto GV, Senthilkumar K, Rai P, Kabekkodu SP, Karunasagar I, Kumar BK. Current  
531 methods for the diagnosis of leptospirosis: Issues and challenges. J Microbiol  
532 Methods. 2022;195: 106438. doi:10.1016/J.MIMET.2022.106438
- 533 30. World Health Organization (WHO). Report of the Second Meeting of the  
534 Leptospirosis Burden Epidemiology Reference Group. 2011 [cited 13 Apr 2022].  
535 Available: [www.who.int](http://www.who.int)
- 536 31. Prasad CB, Das S, Milton A. Neglected Zoonotic Diseases of India-A Review. J One  
537 Heal. 08: 29–38. Available: [www.jakraya.com/journal/joh](http://www.jakraya.com/journal/joh)
